# Supplementary material for: Phase I study of tirabrutinib (ONO‐4059/GS‐4059) in patients with relapsed or refractory B‐cell malignancies in Japan
Source: PubMed Central journal article supplement — Cancer Sci. 2019 Mar 28;110(5):1686–94. doi: 10.1111/cas.13983 (PMC6500982; doi:10.1111/cas.13983), 2019-03-28
Supplement: CAS-110-1686-s002.pdf [file CAS-110-1686-s002.pdf]

**Table S1. Pharmacokinetic (PK) parameters of tirabrutinib****A. PK parameters of tirabrutinib on Cycle 1 Day 1 in the fasting state**

| Mean ± SD                              | Plasma tirabrutinib        |                            |                            |                             |
|----------------------------------------|----------------------------|----------------------------|----------------------------|-----------------------------|
|                                        | 160 mg QD<br>Cycle 1 Day 1 | 320 mg QD<br>Cycle 1 Day 1 | 480 mg QD<br>Cycle 1 Day 1 | 300 mg BID<br>Cycle 1 Day 1 |
| <b>N</b>                               | 3                          | 3                          | 4                          | 7                           |
| <b>C<sub>max</sub> (ng/mL)</b>         | 611 ± 62.7                 | 1220 ± 266                 | 1280 ± 440                 | 886 ± 311                   |
| <b>T<sub>max</sub><sup>†</sup> (h)</b> | 2.85 (1.92–3.03)           | 2.00 (1.83–4.08)           | 2.93 (2.70–3.08)           | 2.85 (1.83–11.7)            |
| <b>AUC<sub>12h</sub> (ng·h/mL)</b>     | 2860 ± 480                 | 4960 ± 527                 | 6790 ± 1930                | 4750 ± 1580                 |
| <b>AUC<sub>24h</sub> (ng·h/mL)</b>     | 3290 ± 555                 | 5700 ± 578                 | 8500 ± 1700                | –                           |
| <b>AUC<sub>inf</sub> (ng·h/mL)</b>     | 3410 ± 545                 | 5890 ± 570                 | 9130 ± 1460                | 5480 ± 2260 <sup>‡</sup>    |
| <b>T<sub>1/2</sub> (h)</b>             | 4.96 ± 1.13                | 4.92 ± 0.745               | 6.38 ± 2.80                | 4.37 ± 1.08 <sup>§</sup>    |

<sup>†</sup>Median (Min–Max), <sup>‡</sup>n=4, <sup>§</sup>n=5

SD, standard deviation; C<sub>max</sub>, maximum serum concentration; T<sub>max</sub>, time to maximum serum concentration; AUC<sub>12h</sub>, area under the concentration–time curve for 12 h; AUC<sub>24h</sub>, area under the concentration–time curve for 24 h; AUC<sub>inf</sub>, area under the concentration–time curve to infinity; T<sub>1/2</sub>, elimination half-life.

**B. PK parameters of tirabrutinib on Cycle 1 Day 28 in the fasting state**

| Mean ± SD                              | Plasma tirabrutinib         |                             |                             |                              |
|----------------------------------------|-----------------------------|-----------------------------|-----------------------------|------------------------------|
|                                        | 160 mg QD<br>Cycle 1 Day 28 | 320 mg QD<br>Cycle 1 Day 28 | 480 mg QD<br>Cycle 1 Day 28 | 300 mg BID<br>Cycle 1 Day 28 |
| <b>N</b>                               | 3                           | 3                           | 4                           | 4                            |
| <b>C<sub>max</sub> (ng/mL)</b>         | 484 ± 64.1                  | 971 ± 394                   | 1940 ± 780                  | 961 ± 462                    |
| <b>T<sub>max</sub><sup>†</sup> (h)</b> | 3.00 (2.95–3.92)            | 3.00 (1.92–4.05)            | 3.61 (2.20–4.07)            | 2.06 (0.900–4.00)            |
| <b>AUC<sub>12h</sub> (ng·h/mL)</b>     | 2590 ± 179                  | 5370 ± 1140                 | 12100 ± 4400                | 5510 ± 2790                  |
| <b>T<sub>1/2</sub> (h)</b>             | 4.52 ± 1.38                 | 4.47 ± 3.02                 | 3.07 ± 0.486                | 5.79 ± 2.64                  |

<sup>†</sup>Median (Min–Max)

SD, standard deviation; C<sub>max</sub>, maximum serum concentration; T<sub>max</sub>, time to maximum serum concentration; AUC<sub>12h</sub>, area under the concentration–time curve for 12 h; T<sub>1/2</sub>, elimination half-life.
